# Supplementary material for: Bubble dynamics manipulation in polymeric foaming
Source: Royal Society of Chemistry journal article supplement (doi:10.1039/d4sm01040j), 2024-01-01
Supplement: d4sm01040j1.pdf [file d4sm01040j1.pdf]

## SUPPORTING INFORMATION

### *Bubble dynamics manipulation in polymeric foaming*

Lorenzo Miele<sup>a,b</sup>, Antonio Abate<sup>a</sup>, Kentaro Taki<sup>c,\*</sup>, and Ernesto Di Maio<sup>a,b,\*</sup>

<sup>a</sup>*Dipartimento di Ingegneria Chimica, dei Materiali e della Produzione Industriale, University of Naples Federico II, Naples, Italy*

<sup>b</sup>*foamlab, University of Naples Federico II, Naples, Italy*

<sup>c</sup>*School of Frontier Engineering, College of Science and Engineering, Kanazawa University, Kanazawa, Japan*

\*corresponding authors. E-mail: taki@se.kanazawa-u.ac.jp; edimaio@unina.it

## 1 Rheological measurements

The linear viscolastic properties of the polymer were measured at 180° using an MCR-WESP rheometer, Anton-Paar, Austria.

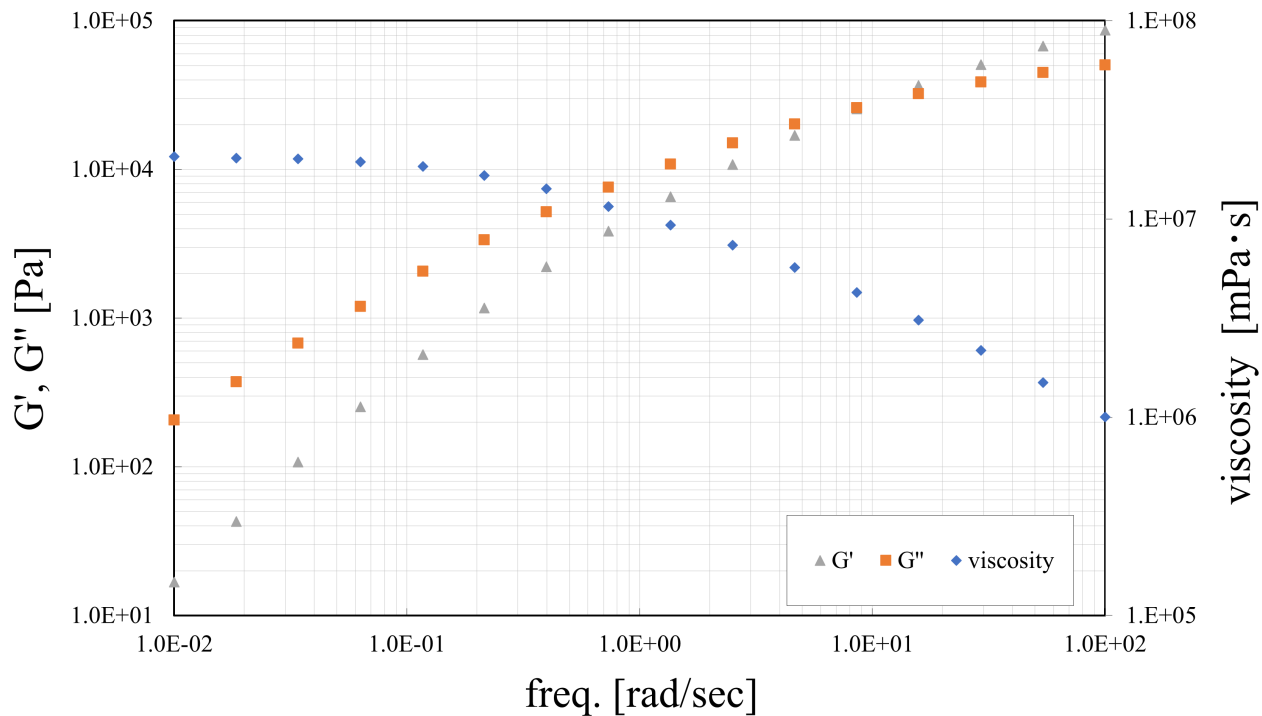

Figure SI 1:  $G'$ ,  $G''$ , and viscosity ( $\eta$ ) of polypropylene (PP) as a function of the shear rate.
